# Supplementary material for: Analysis of the Anticipatory Behavior Formation Mechanism Induced by Methamphetamine Using a Single Hair
Source: MDPI journal article supplement (doi:10.3390/cells12040654), 2023-02-17
Supplement: s1 [file s1]

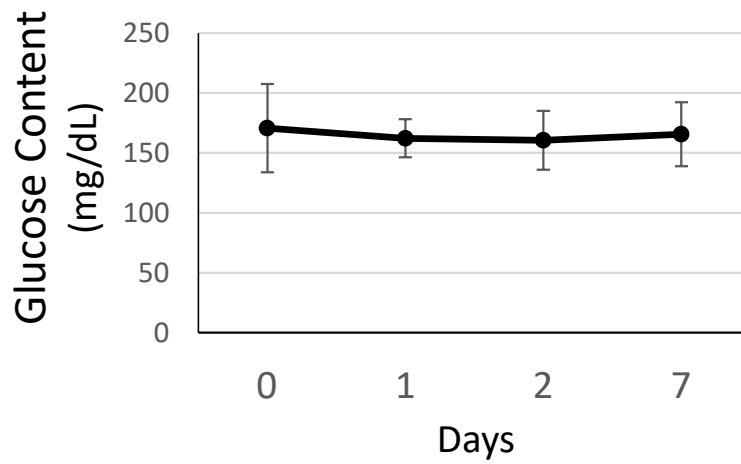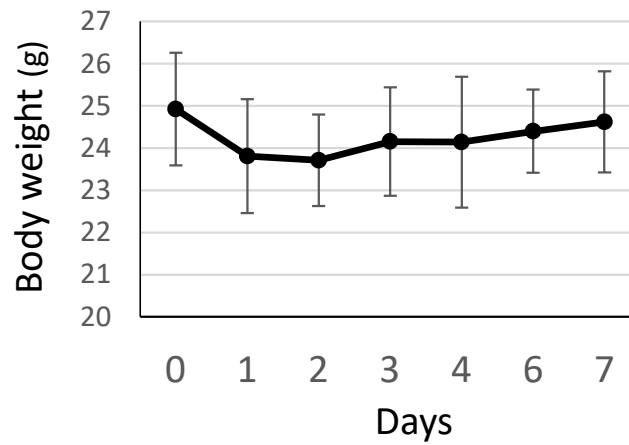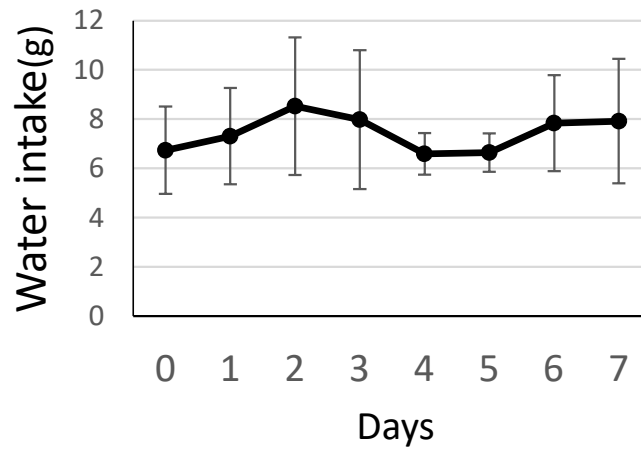

**Supplementary Figure S1. Effects of MAP on blood glucose, body weight, and water intake:**

Blood glucose content, body weight and water intake during MAP injection. Each plot indicates the mean  $\pm$  S.D. ( $n=4$ ). There were no differences in blood glucose, body weight, and water intake during MAP injection.

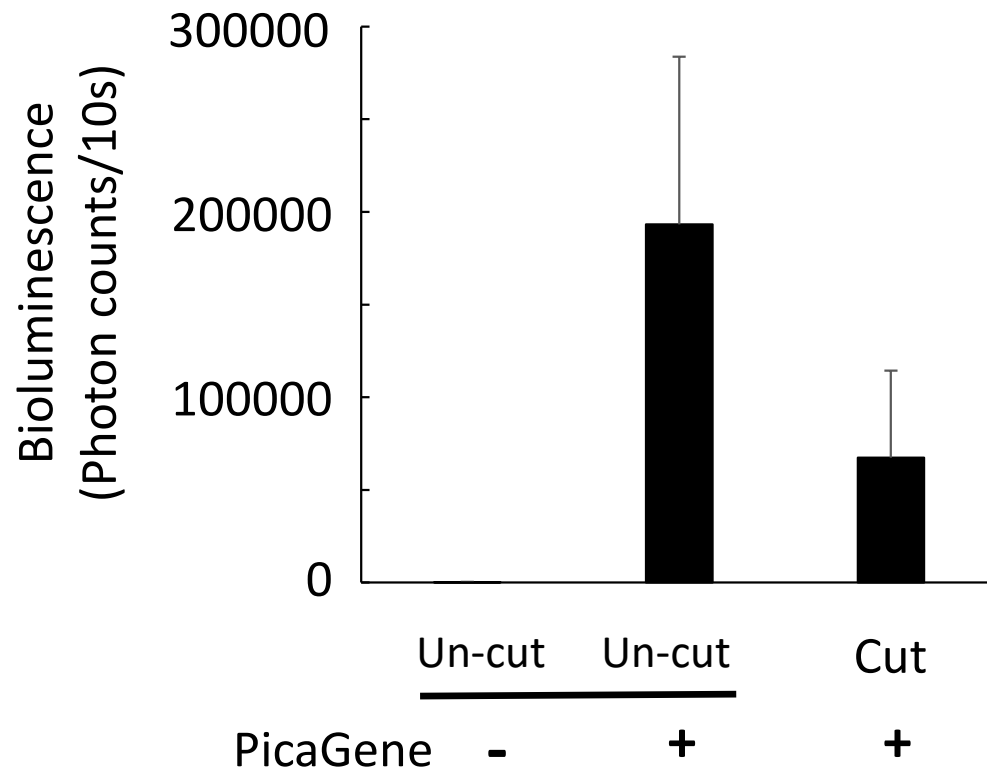

**Supplementary Figure S2. *Per1* expression in a single whisker hair using the direct method:**

– and + indicate the measurement of *Per1* expression with no PicaGene solution and with PicaGene solution, respectively. The un-cut group indicates direct measurement of *Per1* expression in a whisker hair. The cut group indicates the measurement of *Per1* expression from longitudinally cut whisker samples (vertically halved samples). Statistical significance was determined by one-way ANOVA followed by Dunnett's test ( $n=4$  animals) (\* $P<0.05$  vs un-cut (-) group).

Supplementary FigureS2
